# Supplementary material
Source: PubMed Central journal article supplement (PMC8176392)
Supplement: jamaoncol-e211590-s002.pdf [file jamaoncol-e211590-s002.pdf]

## Supplementary Online Content

Steenbeek MP, Harmsen MG, Hoogerbrugge N, et al. Association of salpingectomy with delayed oophorectomy versus salpingo-oophorectomy with quality of life in *BRCA1/2* carriers. *JAMA Oncol*. Published online June 3, 2021. doi:10.1001/jamaoncol.2021.1590

**eTable 1.** Baseline Characteristics per Group (With and Without Postoperative HRT)

**eTable 2.** Overview of Hormone Replacement Therapy at Three and Twelve Months After Surgery

**eTable 3.** Subscales of the Greene Climacteric Scale in Women Without Hormone Replacement Therapy

**eTable 4.** Subscales of the Greene Climacteric Scale in Women With Hormone Replacement Therapy After RRSO

**eTable 5.** Secondary Outcome Measures

**eTable 6.** Surgical Complications and Serious Adverse Events (SAE)

**eFigure 1.** A Schematic Overview of Data Collection and Timing of Questionnaires

**eFigure 2.** Box Plots of the Greene Climacteric Scale

This supplementary material has been provided by the authors to give readers additional information about their work.

**eTable 1. Baseline characteristics per group (with and without postoperative HRT)**

|                                                                                                                                                                                     | RRS<br>without HRT |       | RRSO<br>without HRT<br>at three months |       | P-value | RRS<br>total |       | RRSO<br>with HRT at<br>three months |       | P-<br>value |
|-------------------------------------------------------------------------------------------------------------------------------------------------------------------------------------|--------------------|-------|----------------------------------------|-------|---------|--------------|-------|-------------------------------------|-------|-------------|
|                                                                                                                                                                                     | Mean/N             | SD/%  | Mean/N                                 | SD/%  |         | Mean/N       | SD/%  | Mean/N                              | SD/%  |             |
|                                                                                                                                                                                     | n=                 | 368   | n=                                     | 42    |         | n=           | 375   | n=                                  | 97    |             |
| Age at first questionnaire                                                                                                                                                          | 36.6               | 3.5   | 38.9                                   | 3.1   | <0.001  | 36.6         | 3.5   | 38.8                                | 2.9   | <0.001      |
| <i>BRCA1</i>                                                                                                                                                                        | 35.3               | 3.2   | 37.0                                   | 2.0   | 0.026   | 35.3         | 3.2   | 37.0                                | 2.0   | <0.001      |
| <i>BRCA2</i>                                                                                                                                                                        | 37.8               | 3.4   | 40.9                                   | 2.8   | <0.001  | 37.8         | 3.4   | 41.8                                | 1.5   | <0.001      |
| Age at first surgery                                                                                                                                                                | 36.8               | 3.5   | 39.0                                   | 3.0   | <0.001  | 36.8         | 3.5   | 38.8                                | 2.9   | <0.001      |
| <i>BRCA1</i>                                                                                                                                                                        | 35.5               | 3.2   | 37.0                                   | 3.2   | 0.031   | 35.5         | 3.2   | 37.0                                | 1.9   | <0.001      |
| <i>BRCA2</i>                                                                                                                                                                        | 37.9               | 3.4   | 41.0                                   | 2.8   | <0.001  | 38.0         | 3.4   | 41.9                                | 1.5   | <0.001      |
| Type of <i>BRCA</i> pathogenic variant                                                                                                                                              |                    |       |                                        |       | NS      |              |       |                                     |       | NS          |
| <i>BRCA1</i>                                                                                                                                                                        | 177                | 48.1% | 21                                     | 50.0% |         | 180          | 48.0% | 62                                  | 63.9% |             |
| <i>BRCA2</i>                                                                                                                                                                        | 191                | 51.9% | 21                                     | 50.0% |         | 195          | 52.0% | 35                                  | 36.1% |             |
| Time since pathogenic variant detection                                                                                                                                             |                    |       |                                        |       | NS      |              |       |                                     |       | NS          |
| < 5 years                                                                                                                                                                           | 181                | 49.2% | 24                                     | 57.1% |         | 185          | 49.3% | 49                                  | 50.5% |             |
| ≥ 5 years                                                                                                                                                                           | 184                | 50.0% | 18                                     | 42.9% |         | 188          | 50.1% | 48                                  | 49.5% |             |
| Unknown                                                                                                                                                                             | 3                  | 0.8%  |                                        |       |         | 2            | 0.5%  |                                     | 0.0%  |             |
| Relationship status                                                                                                                                                                 |                    |       |                                        |       | NS      |              |       |                                     |       | NS          |
| Conjoined                                                                                                                                                                           | 328                | 89.1% | 38                                     | 90.5% |         | 335          | 89.3% | 90                                  | 92.8% |             |
| Single                                                                                                                                                                              | 38                 | 10.3% | 4                                      | 9.5%  |         | 38           | 10.1% | 7                                   | 7.2%  |             |
| Unknown                                                                                                                                                                             | 2                  | 0.5%  |                                        |       |         | 2            | 0.5%  |                                     |       |             |
| Offspring                                                                                                                                                                           |                    |       |                                        |       | NS      |              |       |                                     |       | NS          |
| No                                                                                                                                                                                  | 43                 | 11.7% | 6                                      | 14.3% |         | 45           | 12.0% | 7                                   | 7.2%  |             |
| Yes                                                                                                                                                                                 | 322                | 87.5% | 36                                     | 85.7% |         | 327          | 87.2% | 90                                  | 92.8% |             |
| Unknown                                                                                                                                                                             | 3                  | 0.8%  |                                        |       |         | 3            | 0.8%  |                                     |       |             |
| Educational level                                                                                                                                                                   |                    |       |                                        |       | NS      |              |       |                                     |       | NS          |
| Low                                                                                                                                                                                 | 40                 | 10.9% | 6                                      | 14.3% |         | 40           | 10.7% | 10                                  | 10.3% |             |
| Medium                                                                                                                                                                              | 131                | 35.6% | 20                                     | 47.6% |         | 133          | 35.5% | 33                                  | 34.0% |             |
| High                                                                                                                                                                                | 195                | 53.0% | 16                                     | 38.1% |         | 200          | 53.3% | 54                                  | 55.7% |             |
| Unknown                                                                                                                                                                             | 2                  | 0.5%  |                                        |       |         | 2            | 0.5%  |                                     |       |             |
| Breast cancer in personal history                                                                                                                                                   |                    |       |                                        |       | <0.001  |              |       |                                     |       | 0.001       |
| No                                                                                                                                                                                  | 310                | 84.2% | 25                                     | 59.5% |         | 317          | 84.5% | 95                                  | 97.9% |             |
| Yes                                                                                                                                                                                 | 56                 | 15.2% | 17                                     | 40.5% |         | 56           | 14.9% | 2                                   | 2.1%  |             |
| Unknown                                                                                                                                                                             | 2                  | 0.5%  |                                        |       |         | 2            | 0.5%  |                                     |       |             |
| Risk reducing mastectomy                                                                                                                                                            |                    |       |                                        |       | NS      |              |       |                                     |       | NS          |
| No                                                                                                                                                                                  | 222                | 60.3% | 24                                     | 57.1% |         | 224          | 59.7% | 32                                  | 33.0% |             |
| Yes                                                                                                                                                                                 | 144                | 39.1% | 18                                     | 42.9% |         | 149          | 39.7% | 65                                  | 67.0% |             |
| Unknown                                                                                                                                                                             | 2                  | 0.5%  |                                        |       |         | 2            | 0.5%  |                                     |       |             |
| First degree family member with breast cancer                                                                                                                                       |                    |       |                                        |       | NS      |              |       |                                     |       | NS          |
| No                                                                                                                                                                                  | 189                | 51.4% | 23                                     | 54.8% |         | 190          | 50.7% | 57                                  | 58.8% |             |
| Yes                                                                                                                                                                                 | 176                | 47.8% | 19                                     | 45.2% |         | 182          | 48.5% | 40                                  | 41.2% |             |
| Unknown                                                                                                                                                                             | 3                  | 0.8%  |                                        |       |         | 3            | 0.8%  |                                     |       |             |
| First degree family member with ovarian cancer                                                                                                                                      |                    |       |                                        |       | NS      |              |       |                                     |       | NS          |
| No                                                                                                                                                                                  | 316                | 85.9% | 39                                     | 92.9% |         | 323          | 86.1% | 77                                  | 79.4% |             |
| Yes                                                                                                                                                                                 | 49                 | 13.3% | 3                                      | 7.1%  |         | 49           | 13.1% | 20                                  | 20.6% |             |
| unknown                                                                                                                                                                             |                    |       |                                        |       |         | 3            | 0.8%  |                                     |       |             |
| Abbreviations: RRS risk-reducing salpingectomy; RRSO risk-reducing salpingo-oophorectomy; N number of patients; SD standard deviation; CFB change from baseline; NS not significant |                    |       |                                        |       |         |              |       |                                     |       |             |

**eTable 2. Overview of hormone replacement therapy at three and twelve months after surgery**

|                         | Dosage a day | Three months | One year |
|-------------------------|--------------|--------------|----------|
| Tibolon                 |              | 58 (60%)     | 43 (54%) |
|                         | 2,5 mg       | 58 (60%)     | 43 (54%) |
| Estradiol/dydrogesteron |              | 21 (22%)     | 22 (28%) |
|                         | 1 mg / 5 mg  | 11 (11%)     | 8 (10%)  |
|                         | 1 mg / 10 mg | 2 (2%)       | -        |
|                         | 2 mg / 10 mg | -            | 3 (4%)   |
|                         | Unknown      | 8 (8%)       | 11 (14%) |
| Transdermal estradiol   |              | 6 (6%)       | 7 (89%)  |
|                         | 50 ugr       | 2 (2%)       | 4 (5%)   |
|                         | 75 ugr       | 1 (1%)       | 1 (1%)   |
|                         | Unknown      | 3 (3%)       | 2 (3%)   |
| Other                   |              | 2 (2%)       | 1 (1%)   |
| Unknown                 |              | 10 (10%)     | 6 (8%)   |

**eTable 3. Subscales of the Greene Climacteric Scale in women without hormone replacement therapy.**

|                                           |                       | RRS |                  |                      | RRSO |                  |                      | RRSO - RRS       |         | P-value |
|-------------------------------------------|-----------------------|-----|------------------|----------------------|------|------------------|----------------------|------------------|---------|---------|
|                                           |                       | N   | Observed Mean    | SD                   | N    | Observed Mean    | SD                   | Adjusted MD      | 95% CI  |         |
| <b>Anxiety</b><br><i>range</i><br>0-18    | Baseline <sup>a</sup> | 368 | 2.0 <sup>a</sup> | 1.0;4.0 <sup>a</sup> | 42   | 3.0 <sup>a</sup> | 2.0;4.0 <sup>a</sup> | 1.8 <sup>b</sup> | 1.2;2.4 | <0.001  |
|                                           | 3 months CFB          | 368 | 0.1              | 2.2                  | 42   | 2.0              | 2.7                  |                  |         |         |
|                                           | 1 year CFB            | 296 | 0.2              | 2.4                  | 40   | 1.8              | 2.9                  |                  |         |         |
| <b>Depression</b><br><i>range</i><br>0-15 | Baseline <sup>a</sup> | 368 | 2.0 <sup>a</sup> | 1.0;4.0 <sup>a</sup> | 42   | 3.0 <sup>a</sup> | 2.0;5.0 <sup>a</sup> | 1.0 <sup>b</sup> | 0.5;1.6 | <0.001  |
|                                           | 3 months CFB          | 368 | 0.2              | 2.1                  | 42   | 0.8              | 2.3                  |                  |         |         |
|                                           | 1 year CFB            | 296 | 0.1              | 2.4                  | 40   | 1.0              | 2.6                  |                  |         |         |
| <b>Somatic</b><br><i>range</i><br>0-21    | Baseline <sup>a</sup> | 368 | 1.0 <sup>a</sup> | 0.0;3.0 <sup>a</sup> | 42   | 2.0 <sup>a</sup> | 1.0;3.3 <sup>a</sup> | 1.4 <sup>b</sup> | 0.8;2.0 | <0.001  |
|                                           | 3 months CFB          | 368 | 0.3              | 2.1                  | 42   | 1.7              | 2.3                  |                  |         |         |
|                                           | 1 year CFB            | 296 | 0.3              | 2.3                  | 40   | 1.8              | 3.1                  |                  |         |         |
| <b>Vasomotor</b><br><i>range</i><br>0-6   | Baseline <sup>a</sup> | 368 | 0.0 <sup>a</sup> | 0.0;0.0 <sup>a</sup> | 42   | 0.0 <sup>a</sup> | 0.0;0.0 <sup>a</sup> | 2.0 <sup>b</sup> | 1.8;2.2 | <0.001  |
|                                           | 3 months CFB          | 368 | 0.0              | 0.7                  | 42   | 2.1              | 1.3                  |                  |         |         |
|                                           | 1 year CFB            | 296 | 0.1              | 0.8                  | 40   | 2.1              | 1.3                  |                  |         |         |
| <b>Sexual</b><br><i>range</i><br>0-3      | Baseline <sup>a</sup> | 368 | 0.0 <sup>a</sup> | 0.0;0.0 <sup>a</sup> | 42   | 1.0 <sup>a</sup> | 0.0;1.0 <sup>a</sup> | 0.5 <sup>b</sup> | 0.3;0.7 | <0.001  |
|                                           | 3 months CFB          | 368 | -0.3             | 0.7                  | 42   | 0.3              | 0.8                  |                  |         |         |
|                                           | 1 year CFB            | 296 | 0.0              | 0.8                  | 40   | 0.7              | 0.9                  |                  |         |         |

<sup>a</sup> median and interquartile range (IQR)

<sup>b</sup> Interaction between choice and visit was not statistically significant (p=0.7), thus the adjusted estimated difference is the same for both timepoints

\* Baseline value of women with hormone replacement therapy at three months after RRSO; median and interquartile range (IQR)

Abbreviations: RRS risk-reducing salpingectomy; RRSO risk-reducing salpingo-oophorectomy; MD mean difference; SD standard deviation; CFB change from baseline; 95% CI 95% confidence interval; NS not significant

**eTable 4. Subscales of the Greene Climacteric Scale in women with hormone replacement therapy after RRSO.**

|                                           |              | RRS |               |         | RRSO |               |         | RRSO - RRS  |         | P-value |
|-------------------------------------------|--------------|-----|---------------|---------|------|---------------|---------|-------------|---------|---------|
|                                           |              | N   | Observed Mean | SD      | N    | Observed Mean | SD      | Adjusted MD | 95% CI  |         |
| <b>Anxiety</b><br><i>range</i><br>0-18    | Baseline*    | 375 | 2.0           | 1.0;4.0 | 97   | 2.0           | 1.0;4.0 | 0.9         | 0.4;1.3 | <0.001  |
|                                           | 3 months CFB | 375 | 0.2           | 2.2     | 97   | 0.7           | 2.5     |             |         |         |
|                                           | 1 year CFB   | 302 | 0.2           | 2.4     | 79   | 1.1           | 3.3     |             |         |         |
| <b>Depression</b><br><i>range</i><br>0-15 | Baseline*    | 375 | 2.0           | 1.0-4.0 | 97   | 2.0           | 1.0-4.0 | 0.6         | 0.2;1.1 | 0.004   |
|                                           | 3 months CFB | 375 | 0.8           | 2.4     | 97   | 0.8           | 2.4     |             |         |         |
|                                           | 1 year CFB   | 302 | 1.3           | 2.1     | 79   | 1.1           | 3.3     |             |         |         |
| <b>Somatic</b><br><i>range</i><br>0-21    | Baseline*    | 375 | 1.0           | 0.0-3.0 | 97   | 1.0           | 1.0;3.0 | 0.8         | 0.4;1.2 | <0.001  |
|                                           | 3 months CFB | 375 | 0.3           | 2.1     | 97   | 1.0           | 2.4     |             |         |         |
|                                           | 1 year CFB   | 302 | 0.3           | 2.3     | 79   | 1.3           | 2.1     |             |         |         |
| <b>Vasomotor</b><br><i>range</i><br>0-6   | Baseline*    | 375 | 0.0           | 0.0-0.0 | 97   | 0.0           | 0.0;1.0 | 1.0         | 0.8;1.2 | <0.001  |
|                                           | 3 months CFB | 375 | 0.0           | 0.7     | 97   | 1.0           | 1.2     |             |         |         |
|                                           | 1 year CFB   | 302 | 0.1           | 0.8     | 79   | 0.9           | 1.2     |             |         |         |
| <b>Sexual</b><br><i>range</i><br>0-3      | Baseline*    | 375 | 0.0           | 0.0;1.0 | 97   | 0.0           | 0.0;1.0 | 0.2         | 0.0;0.3 | 0.012   |
|                                           | 3 months CFB | 375 | 0.0           | 0.7     | 97   | 0.1           | 0.9     |             |         |         |
|                                           | 1 year CFB   | 302 | 0.0           | 0.8     | 79   | 0.2           | 1.0     |             |         |         |

\* Baseline value of women with hormone replacement therapy at three months after RRSO; median and interquartile range (IQR)

Abbreviations: RRS risk-reducing salpingectomy; RRSO risk-reducing salpingo-oophorectomy; MD mean difference; SD standard deviation; CFB change from baseline; 95% CI 95% confidence interval; NS not significant

**eTable 5. Secondary outcome measures**

|                                              |                                         |                       | RRS |                   |                        | RRSO |                   |                        | RRSO - RRS  |           |         |
|----------------------------------------------|-----------------------------------------|-----------------------|-----|-------------------|------------------------|------|-------------------|------------------------|-------------|-----------|---------|
|                                              |                                         |                       | N   | Observed Mean     | SD                     | N    | Observed Mean     | SD                     | Adjusted MD | 95% CI    | P-value |
| <b>Women without HRT</b>                     |                                         |                       |     |                   |                        |      |                   |                        |             |           |         |
| <b>SF-36</b>                                 | <b>Physical component summary score</b> |                       |     |                   |                        |      |                   |                        |             |           |         |
|                                              | BRCA1/2                                 | Baseline <sup>a</sup> | 368 | 56.2 <sup>a</sup> | 15.2;58.6 <sup>a</sup> | 42   | 53.0 <sup>a</sup> | 40.5;57.8 <sup>a</sup> |             |           |         |
|                                              |                                         | 3 months CFB          | 368 | 0.0               | 6.3                    | 42   | 0.9               | 6.7                    | -1.5        | -3.3;0.3  | NS      |
|                                              |                                         | 1 year CFB            | 296 | 0.1               | 7.5                    | 40   | 0.8               | 12.3                   | -1.9        | -4.2;0.5  | NS      |
|                                              | <b>Mental component summary score</b>   |                       |     |                   |                        |      |                   |                        |             |           |         |
|                                              | BRCA1/2                                 | Baseline <sup>a</sup> | 368 | 52.6 <sup>a</sup> | 46.4;56.1 <sup>a</sup> | 42   | 46.3 <sup>a</sup> | 38.6;55.2 <sup>a</sup> |             |           |         |
|                                              |                                         | 3 months CFB          | 368 | -0.5              | 7.8                    | 42   | 0.5               | 10.1                   | 0.0         | -2.7;2.6  | NS      |
|                                              |                                         | 1 year CFB            | 296 | -5.0              | 12.6                   | 40   | -1.4              | 13.5                   | 2.4         | -1.8;6.6  | NS      |
| <b>FSFI</b>                                  |                                         |                       |     |                   |                        |      |                   |                        |             |           |         |
| Range 2-36                                   | BRCA1/2                                 | Baseline <sup>a</sup> | 368 | 30.5 <sup>a</sup> | 24.8;32.6 <sup>a</sup> | 42   | 29.2 <sup>a</sup> | 20.0;29.0 <sup>a</sup> |             |           |         |
|                                              |                                         | 3 months CFB          | 368 | 0.3               | 6.9                    | 42   | -2.1              | 8.4                    | -2.8        | -4.9;-0.6 | 0.011   |
|                                              |                                         | 1 year CFB            | 296 | 0.3               | 7.1                    | 40   | -5.1              | 8.2                    | -5.7        | -7.9;-3.5 | <0.001  |
| <b>FSDS</b>                                  |                                         |                       |     |                   |                        |      |                   |                        |             |           |         |
| Range 2-52                                   | BRCA1/2                                 | Baseline <sup>a</sup> | 368 | 4.0 <sup>a</sup>  | 0.0;11.0 <sup>a</sup>  | 42   | 4.5 <sup>a</sup>  | 0.0;16.5 <sup>a</sup>  |             |           |         |
|                                              |                                         | 3 months CFB          | 368 | 0.7               | 6.8                    | 42   | 3.7               | 8.9                    | 3.6         | 1.4;5.8   | 0.002   |
|                                              |                                         | 1 year CFB            | 296 | 0.8               | 7.3                    | 40   | 6.5               | 11.0                   | 7.0         | 4.5;9.5   | <0.001  |
| <b>CWS</b>                                   |                                         |                       |     |                   |                        |      |                   |                        |             |           |         |
| Range 8-32                                   | BRCA1/2                                 | Baseline <sup>a</sup> | 368 | 14.0 <sup>a</sup> | 12.0;16.0 <sup>a</sup> | 42   | 14.5 <sup>a</sup> | 12.0;17.3 <sup>a</sup> |             |           |         |
|                                              |                                         | 3 months CFB          | 368 | -1.5              | 2.6                    | 42   | -1.9              | 3.6                    | -0.4        | -1.2;0.4  | NS      |
|                                              |                                         | 1 year CFB            | 296 | -1.6              | 3.1                    | 40   | -1.9              | 4.1                    | -0.5        | -1.5;0.6  | NS      |
| <b>DCS</b>                                   |                                         |                       |     |                   |                        |      |                   |                        |             |           |         |
| Range 0-100                                  | BRCA1/2                                 | Baseline <sup>a</sup> | 368 | 30.5 <sup>a</sup> | 24.8;32.6 <sup>a</sup> | 42   | 29.2 <sup>a</sup> | 20.0;32.0 <sup>a</sup> |             |           | NS      |
| <b>DRS</b>                                   |                                         |                       |     |                   |                        |      |                   |                        |             |           |         |
| Range 0-100                                  | BRCA1/2                                 | 1 year                | 296 | 12.7              | 15.1                   | 40   | 16.1              | 17.6                   | -0.5        | -5.0;6.1  | NS      |
| <b>Women with HRT after RRSO<sup>b</sup></b> |                                         |                       |     |                   |                        |      |                   |                        |             |           |         |
| <b>SF-36</b>                                 | <b>Physical component summary score</b> |                       |     |                   |                        |      |                   |                        |             |           |         |
|                                              | BRCA1/2                                 | Baseline <sup>c</sup> | 375 | 56.1 <sup>c</sup> | 51.9;58.7 <sup>c</sup> | 97   | 56.3 <sup>c</sup> | 53.4;58.7 <sup>c</sup> |             |           |         |
|                                              |                                         | 3 months CFB          | 375 | 0.1               | 6.4                    | 97   | -2.2              | 7.8                    | -2.4        | -3.8;-1.0 | 0.001   |
|                                              |                                         | 1 year CFB            | 302 | 0.7               | 7.4                    | 79   | -1.1              | 7.1                    | -1.2        | -2.9;0.5  | NS      |

**eTable 5. Secondary outcome measures - continued**

|              |                                       |                       | RRS |                   |                        | RRSO |                   |                        | RRSO-RRS    |           |         |
|--------------|---------------------------------------|-----------------------|-----|-------------------|------------------------|------|-------------------|------------------------|-------------|-----------|---------|
|              |                                       |                       | N   | Observed Mean     | SD                     | N    | Observed Mean     | SD                     | Adjusted MD | 95%-CI    | P-value |
| <b>SF-36</b> | <b>Mental component summary score</b> |                       |     |                   |                        |      |                   |                        |             |           |         |
|              | <i>BRCA1/2</i>                        | Baseline <sup>c</sup> | 375 | 52.6 <sup>c</sup> | 46.2;56.0 <sup>c</sup> | 97   | 52.4 <sup>c</sup> | 47.1;56.0 <sup>c</sup> |             |           |         |
|              |                                       | 3 months CFB          | 375 | -0.5              | 7.8                    | 97   | -2.0              | 9.7                    | -1.2        | -3.1;0.7  | NS      |
|              |                                       | 1 year CFB            | 302 | -5.0              | 12.6                   | 79   | -8.0              | 12.7                   | -2.8        | -6.0;0.4  | NS      |
| <b>FSFI</b>  |                                       |                       |     |                   |                        |      |                   |                        |             |           |         |
| <i>Range</i> | <i>BRCA1/2</i>                        | Baseline <sup>c</sup> | 375 | 30.5 <sup>c</sup> | 24.4;32.7 <sup>c</sup> | 97   | 28.5 <sup>c</sup> | 21.9;31.7 <sup>c</sup> |             |           |         |
| 2-36         |                                       | 3 months CFB          | 375 | 0.4               | 6.9                    | 97   | 0.2               | 8.2                    | -0.6        | -2.1;1.0  | NS      |
|              |                                       | 1 year CFB            | 302 | 0.3               | 7.0                    | 79   | -1.2              | 10.7                   | -2.0        | -3.8;-0.2 | 0.033   |
| <b>FSDS</b>  |                                       |                       |     |                   |                        |      |                   |                        |             |           |         |
| <i>Range</i> | <i>BRCA1/2</i>                        | Baseline <sup>c</sup> | 375 | 4.0 <sup>c</sup>  | 0.0;11.0 <sup>c</sup>  | 97   | 6.0 <sup>c</sup>  | 0.0;13.5 <sup>c</sup>  |             |           |         |
| 2-52         |                                       | 3 months CFB          | 375 | 0.7               | 6.8                    | 97   | 0.1               | 9.5                    | -0.2        | -1.8;1.5  | NS      |
|              |                                       | 1 year CFB            | 302 | 0.8               | 7.2                    | 79   | 1.4               | 11.0                   | 1.4         | -0.5;3.3  | NS      |
| <b>CWS</b>   |                                       |                       |     |                   |                        |      |                   |                        |             |           |         |
| <i>Range</i> | <i>BRCA1/2</i>                        | Baseline <sup>c</sup> | 375 | 14.0 <sup>c</sup> | 12.0;16.0 <sup>c</sup> | 97   | 14.0 <sup>c</sup> | 12.0;17.0 <sup>c</sup> |             |           |         |
| 8-32         |                                       | 3 months CFB          | 375 | -1.5              | 2.7                    | 97   | -1.9              | 2.5                    | -0.4        | -1.0;0.2  | NS      |
|              |                                       | 1 year CFB            | 302 |                   |                        | 79   | -2.3              | 3.8                    | -0.5        | -1.2;0.3  | NS      |
| <b>DCS</b>   |                                       |                       |     |                   |                        |      |                   |                        |             |           |         |
| <i>Range</i> | <i>BRCA1/2</i>                        | Baseline <sup>c</sup> | 375 | 30.5 <sup>c</sup> | 24.4;32.7 <sup>c</sup> | 97   | 28.5 <sup>c</sup> | 21.9;31.7 <sup>c</sup> |             |           | NS      |
| 0-100        |                                       |                       |     |                   |                        |      |                   |                        |             |           |         |
| <b>DRS</b>   |                                       |                       |     |                   |                        |      |                   |                        |             |           |         |
| <i>Range</i> | <i>BRCA1/2</i>                        | 1 year                | 302 | 12.7              | 15.0                   | 79   | 11.5              | 13.7                   | -2.8        | -6.6;1.0  | NS      |
| 0-100        |                                       |                       |     |                   |                        |      |                   |                        |             |           |         |

<sup>a</sup> Baseline value of women without hormone replacement therapy at three months; median and interquartile range (IQR)  
<sup>b</sup> All women after RRS (with and without HRT) and only the women using HRT after RRSO are included  
<sup>c</sup> Baseline value of women with hormone replacement therapy at three months after RRSO; median and interquartile range (IQR)  
Abbreviations: RRS risk-reducing salpingectomy; RRSO risk-reducing salpingo-oophorectomy; MD mean difference; SD standard deviation; CFB change from baseline; 95% CI 95% confidence interval; SF-36 Short Form 36; FSDS Female Sexual Distress Scale; FSFI Female Sexual Functioning Index; CWS Cancer Worry Scale; DCS Decisional Conflict Scale; DRS Decision Regret Scale

**eTable 6. Surgical complications and serious adverse events (SAE)**

|     | Age                                          | BRCA-<br>PV | (S)AE                                                                   | Time since<br>RRS/RRSO | Treatment                                                       | Relation to<br>study<br>intervention |
|-----|----------------------------------------------|-------------|-------------------------------------------------------------------------|------------------------|-----------------------------------------------------------------|--------------------------------------|
| RRS | <b>Surgical complications within 6 weeks</b> |             |                                                                         |                        |                                                                 |                                      |
|     | 36                                           | BRCA2       | Bilateral luxation of jaw at intubation                                 | During                 | Reposition                                                      | Definite                             |
|     | 43                                           | BRCA2       | Perforation of the uterus by uterine manipulator                        | During                 | Antibiotics                                                     | Definite                             |
|     | 32                                           | BRCA1       | Perforation of the uterus by uterine manipulator                        | During                 | Antibiotics                                                     | Definite                             |
|     | 37                                           | BRCA2       | Perforation of the uterus by uterine manipulator                        | During                 | Antibiotics                                                     | Definite                             |
|     | 40                                           | BRCA2       | Subcutaneous emphysema neck and upper half thorax                       | During                 | Expectative                                                     | Definite                             |
|     | 37                                           | BRCA1       | Subcutaneous hematoma                                                   | During                 | Expectative                                                     | Definite                             |
|     | 39                                           | BRCA1       | Perforation of the bladder                                              | During                 | Cystoscopy,<br>transurethral<br>catheter 7 days,<br>antibiotics | Definite                             |
|     | 32                                           | BRCA2       | Pneumonia and abscess with necrosis of m. rectus abdominis              | +3 days                | Antibiotics and<br>necrolectomy                                 | Definite                             |
|     | 32                                           | BRCA1       | Subcutaneous hematoma                                                   | +1 week                | Expectative                                                     | Definite                             |
|     | 32                                           | BRCA1       | Wound infection                                                         | +1 week                | Antibiotics                                                     | Definite                             |
|     | 38                                           | BRCA2       | Wound infection                                                         | 16 days                | Antibiotics                                                     | Definite                             |
|     | 44                                           | BRCA2       | Wound infection                                                         | +4 days                | Expectative                                                     | Definite                             |
|     | 38                                           | BRCA2       | Wound infection                                                         | +1 week                | Expectative                                                     | Definite                             |
|     | 40                                           | BRCA1       | Wound infection                                                         | +13 days               | Expectative                                                     | Definite                             |
|     | 36                                           | BRCA1       | Wound infection                                                         | <2 weeks               | Expectative                                                     | Definite                             |
|     | 40                                           | BRCA1       | Wound infection                                                         | +16 days               | Expectative                                                     | Definite                             |
|     | 38                                           | BRCA2       | Phlebitis                                                               | +0 days                | Expectative                                                     | Definite                             |
|     | 38                                           | BRCA2       | Neuropathy ulnar nerve                                                  | +0 days                | Expectative                                                     | Probable                             |
|     | 39                                           | BRCA2       | Urinary tract infection                                                 | +13 days               | Antibiotics                                                     | Probable                             |
|     | 35                                           | BRCA1       | Wound infection                                                         | +4 days                | Antibiotics                                                     | Probable                             |
|     |                                              |             | Postprocedural cervical hemorrhage cervix after concomitant LLETZ       | +2 weeks               | Cauterization                                                   | Unrelated*                           |
|     | 30                                           | BRCA1       | Postprocedural cervical hemorrhage cervix after concomitant LLETZ       | +12 days               | Unknown                                                         | Unrelated*                           |
|     | 41                                           | BRCA2       | Wound infection breast after concomitant risk-reducing mastectomy       | +12 days               | Antibiotics and<br>surgery                                      | Unrelated                            |
|     | <b>Miscellaneous serious adverse events</b>  |             |                                                                         |                        |                                                                 |                                      |
|     | 35                                           | BRCA1       | Deep venous thrombosis left subclavian vein                             | +3 months              | Anticoagulants                                                  | Possible                             |
|     | 38                                           | BRCA1       | Breast cancer                                                           | +8 months              | Surgery, CT                                                     | Unlikely                             |
|     | 40                                           | BRCA2       | Breast cancer recurrence (bone metastases and pleuritis carcinomatosis) | +10 months             | CT                                                              | Unlikely                             |
|     | 39                                           | BRCA1       | Breast cancer                                                           | +6 months              | Surgery, CT                                                     | Unlikely                             |
|     | 39                                           | BRCA2       | Breast cancer                                                           | +11 months             | Surgery, HT                                                     | Unlikely                             |

**eTable 6. Surgical complications and serious adverse events (SAE) - *continued***

|             | Age                                          | BRCA-PV | (S)AE                                                                                              | Time since RRS/RRSO    | Treatment                       | Relation to study intervention |
|-------------|----------------------------------------------|---------|----------------------------------------------------------------------------------------------------|------------------------|---------------------------------|--------------------------------|
|             | 42                                           | BRCA2   | Breast cancer                                                                                      | RRS +4 yr<br>RRO +3 yr | Surgery                         | Unlikely                       |
|             | 36                                           | BRCA2   | Breast cancer detected in risk-reducing mastectomy specimen                                        | +10 months             | HT                              | Unlikely                       |
|             | 37                                           | BRCA1   | Breast cancer recurrence (even after bilateral mastectomy) (RRO because of STIC at RRS)            | +1 yr                  | Surgery, CT, RT                 | Unlikely                       |
|             | 43                                           | BRCA1   | Breast cancer detected in risk-reducing mastectomy specimen                                        | +3 yr                  | CT                              | Unlikely                       |
|             | 40                                           | BRCA1   | Osteoarthritis knee (arthroscopy already planned before RRS)                                       | +2 months              | Surgery                         | Unrelated                      |
|             | 43                                           | BRCA2   | Knee injury due to fall from bike                                                                  | +2 yr                  | Surgery                         | Unrelated                      |
|             | 44                                           | BRCA2   | Appendicitis                                                                                       | +3 yr                  | Surgery                         | Unrelated                      |
|             | 31                                           | BRCA1   | Symptomatic gall stones                                                                            | +3 months              | Surgery                         | Unrelated                      |
|             | 36                                           | BRCA1   | Cervical cancer FIGO stage Ia1                                                                     | Before                 | Surgery                         | Unrelated                      |
|             |                                              |         | Vaginal vault dehiscence after concomitant hysterectomy                                            | +6 weeks               | Surgery                         | Unrelated*                     |
|             | 38                                           | BRCA1   | Stress fracture of the hip                                                                         | +6 months              | Surgery                         | Unrelated                      |
|             | 40                                           | BRCA2   | Wound infection after breast surgery                                                               | <1 yr                  | Surgery                         | Unrelated                      |
|             | 42                                           | BRCA2   | Death due to fall from stairs                                                                      | +4 yr                  | N/A                             | Unrelated                      |
|             | 34                                           | BRCA1   | Wound infections after risk-reducing breast surgery                                                | +7 months              | Surgery, antibiotics            | Unrelated                      |
|             | 37                                           | BRCA1   | Infected breast implant                                                                            | +8 months              | Admission, antibiotics          | Unrelated                      |
| <b>RRSO</b> | <b>Surgical complications within 6 weeks</b> |         |                                                                                                    |                        |                                 |                                |
|             | 38                                           | BRCA1   | Nausea and vomiting caused by incisional herniation of small intestine                             | +3 days                | Surgery                         | Definite                       |
|             | 44                                           | BRCA2   | Collapse after hospital discharge                                                                  | +0 days                | Readmission                     | Definite                       |
|             | 39                                           | BRCA1   | Wound infection                                                                                    | +9 days                | Antibiotics                     | Definite                       |
|             | 35                                           | BRCA1   | Wound infection                                                                                    | +15 days               | Expectative                     | Definite                       |
|             | 37                                           | BRCA1   | Vasovagal reaction to insertion of intravenous canule, including asystole                          | During                 | Chest compressions              | Probable                       |
|             | 42                                           | BRCA2   | Urinary tract infection                                                                            | +1 week                | Antibiotics                     | Probable                       |
|             | 43                                           | BRCA2   | Collapse at home                                                                                   | +1 day                 | Expectative                     | Possible                       |
|             | 42                                           | BRCA2   | Ureter injury during concomitant hysterectomy at cleavage of uterine artery next to uterine cervix | During                 | Conversion, reimplantation      | Unrelated*                     |
|             | <b>Miscellaneous serious adverse events</b>  |         |                                                                                                    |                        |                                 |                                |
|             | 40                                           | BRCA2   | Ablation for atrial fibrillation (pre-existent condition at inclusion)                             | +1 yr                  | Cardial ablation                | Unlikely                       |
|             |                                              |         | Wound infection after breast surgery                                                               | +1 yr                  | Surgery                         | Unrelated                      |
|             | 33                                           | BRCA2   | Problems with pre-existent ureteric stents                                                         | +6 weeks               | Admission, nephrostomy catheter | Unrelated                      |

**eTable 6. Surgical complications and serious adverse events (SAE) - *continued***

|                                                                                                                                                                                                                                                                                                                                                                                                                                                                                                                                                   | Age | BRCA-<br>PV | (S)AE                                                                            | Time since<br>RRS/RRSO | Treatment          | Relation to<br>study<br>intervention |
|---------------------------------------------------------------------------------------------------------------------------------------------------------------------------------------------------------------------------------------------------------------------------------------------------------------------------------------------------------------------------------------------------------------------------------------------------------------------------------------------------------------------------------------------------|-----|-------------|----------------------------------------------------------------------------------|------------------------|--------------------|--------------------------------------|
|                                                                                                                                                                                                                                                                                                                                                                                                                                                                                                                                                   | 35  | BRCA1       | Unexplained transient neurological symptoms (headache, muscle ache and backpain) | +3 months              | Hospital admission | Unrelated                            |
|                                                                                                                                                                                                                                                                                                                                                                                                                                                                                                                                                   | 42  | BRCA2       | Bartholinic cyst                                                                 | +5 months              | Surgery            | Unrelated                            |
|                                                                                                                                                                                                                                                                                                                                                                                                                                                                                                                                                   | 38  | BRCA1       | Breast cancer                                                                    | +1 yr                  | Surgery, CT, RT    | Unrelated                            |
|                                                                                                                                                                                                                                                                                                                                                                                                                                                                                                                                                   | 44  | BRCA2       | Breast cancer                                                                    | +3 yr                  | Surgery            | Unrelated                            |
| *(S)AE related to intervention other than study intervention (RRS, RRSO or RRO)<br>Abbreviations: (S)AE (serious) adverse event; RRS risk-reducing salpingectomy; CT chemotherapy; LLETZ Large Loop Excision of the Transformation Zone; HT hormone therapy; RT radiotherapy; N/A not applicable; RRSO risk-reducing salpingo-oophorectomy; RRO risk-reducing oophorectomy;<br>The following events were not included as serious adverse events according to the study protocol: elective hospital admissions, elective (risk-reducing) surgeries |     |             |                                                                                  |                        |                    |                                      |

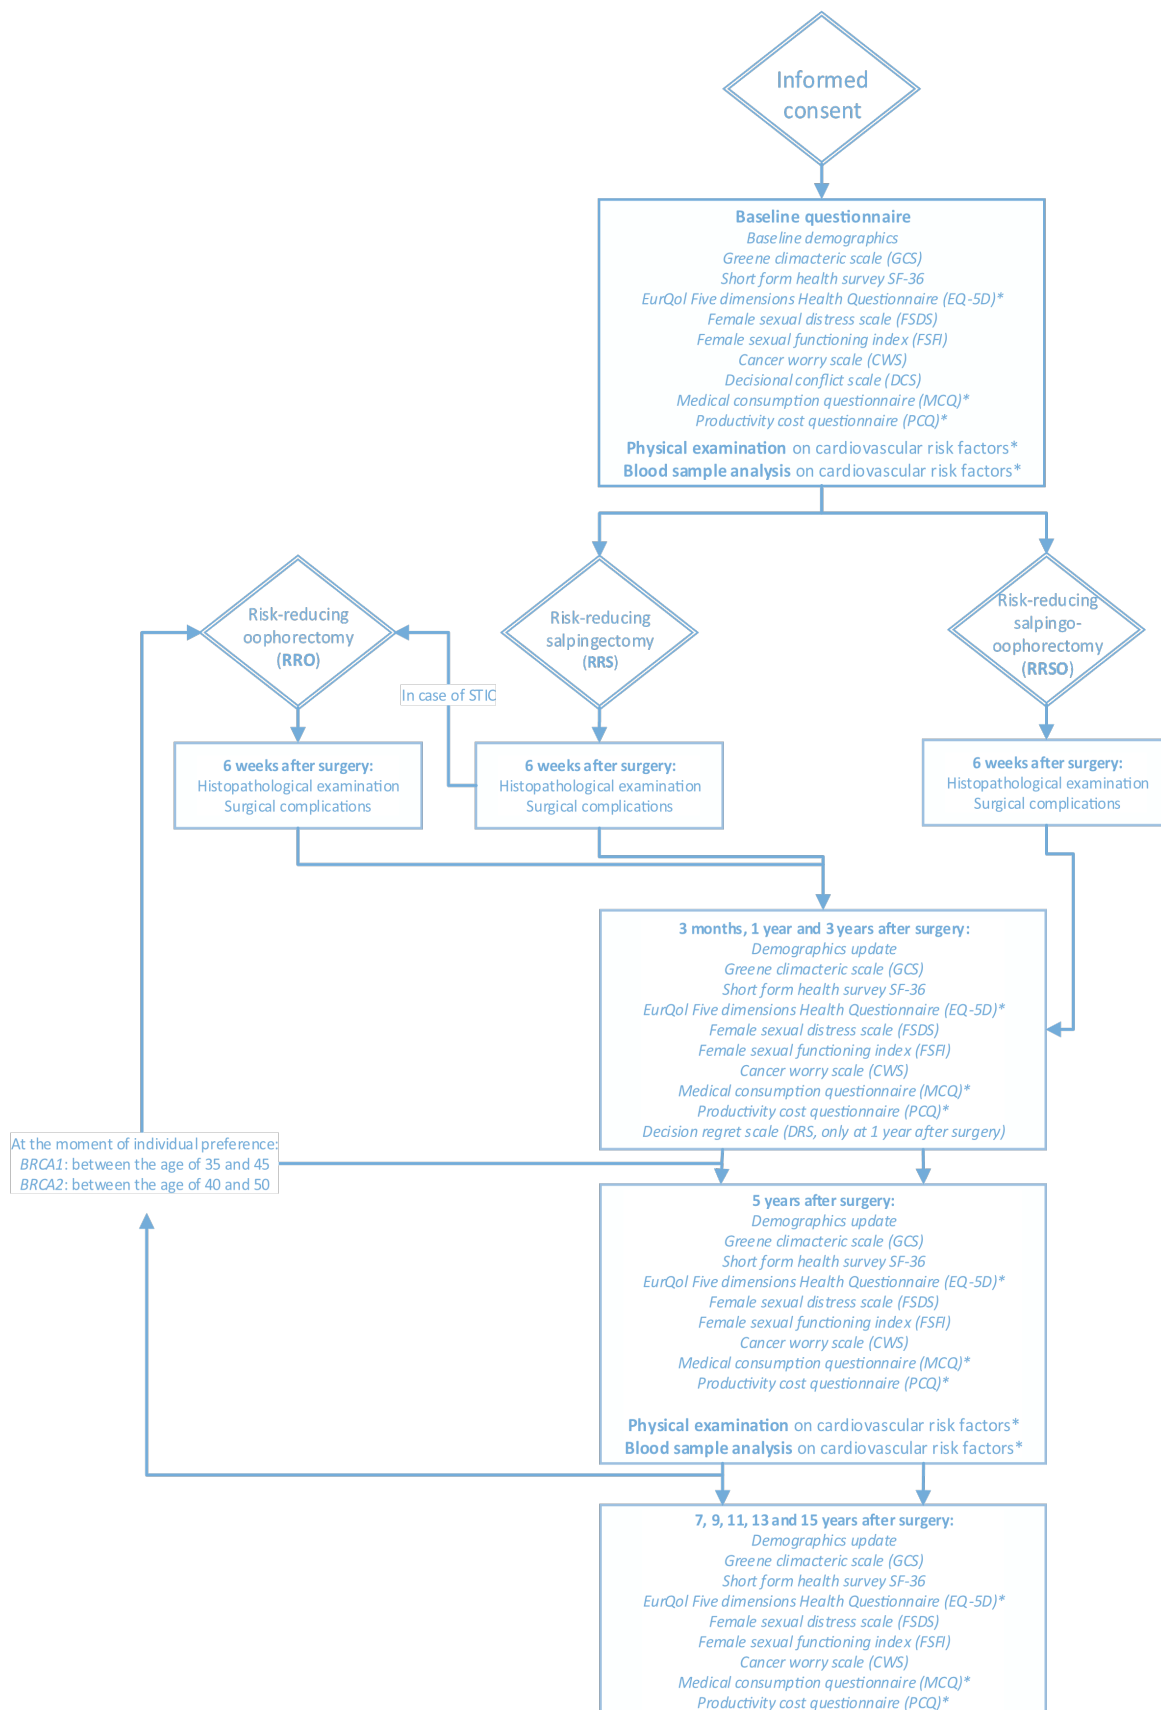

**eFigure 1: A schematic overview of data collection and timing of questionnaires**

\* Secondary outcome measures for which follow-up has not been completed yet, they are not included in this report (evaluation planned at five and eight years after surgery)

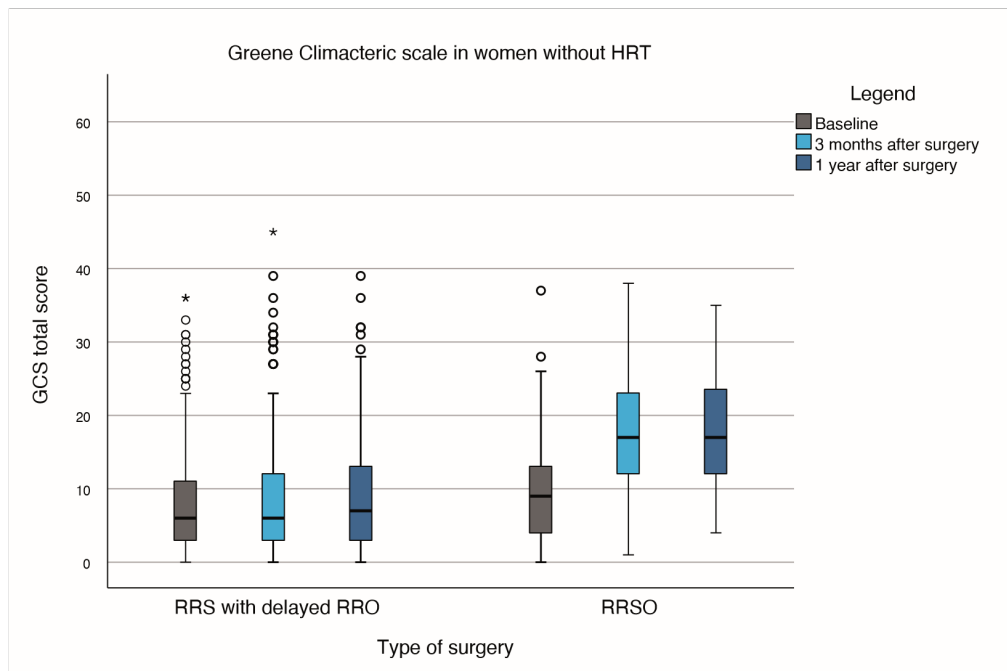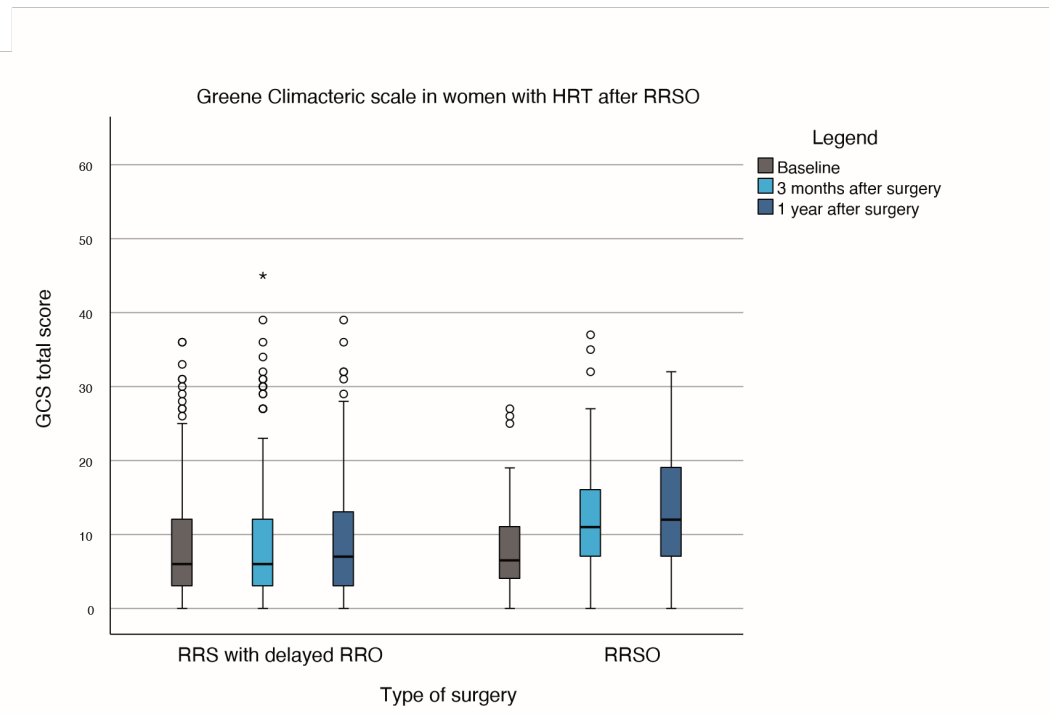

**eFigure 2. Box plots of the Greene climacteric scale**

Abbreviations: HRT hormone replacement therapy; GCS Greene Climacteric scale; RRS risk-reducing salpingectomy; RRO risk-reducing oophorectomy; RRSO risk-reducing salpingo-oophorectomy
